# Supplementary material for: Remdesivir to treat COVID-19: can dosing be optimized?
Source: bioRxiv or medRxiv preprint supplement (doi:10.1101/2021.06.16.21258981), 2021-06-18
Supplement: Supplementary file [file media-3.pdf]

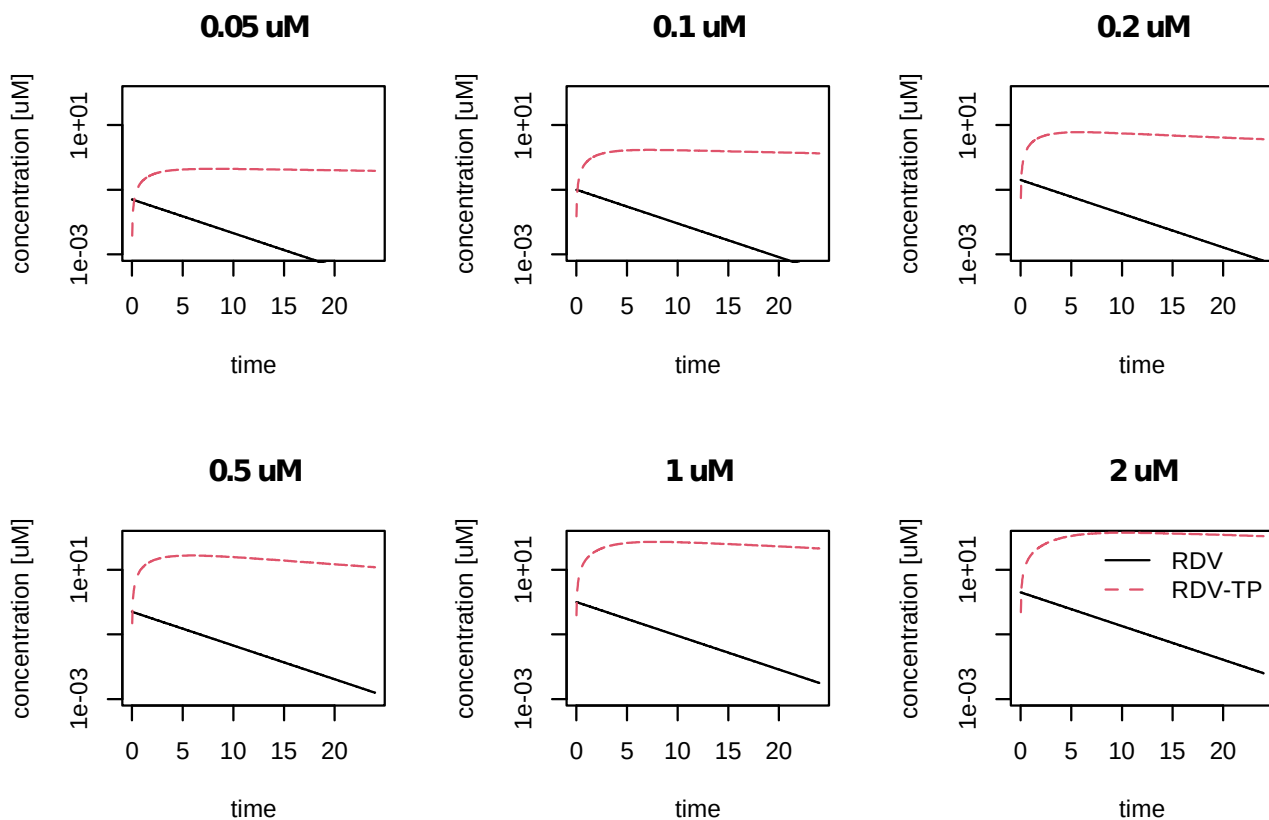

**Figure S2.** Extracellular RDV concentrations and intracellular RDV-TP concentrations during in vitro dose-response experiments. This figure shows the concentrations of RDV and RDV-TP when an initial RDV concentration is supplied in cell culture medium. The parameters are the same as in Figure 2C and D. The title indicates the initial RDV concentration (in  $\mu\text{M}$ ), the black lines the RDV concentration over time, the red lines the intracellular RDV-TP concentrations over time. We assume that the RDV concentration exponentially declines at 37 °C as described in Ayateneo et al. 2020 (main text ref. 38).
